# Supplementary material for: Low-temperature wet chemistry synthetic approaches towards ferrites
Source: Royal Society of Chemistry journal article supplement (doi:10.1039/d0qi00294a), 2020-01-01
Supplement: d0qi00294a1.pdf [file d0qi00294a1.pdf]

### Low-temperature wet chemistry synthetic approaches towards ferrites

Stefano Diodati,<sup>a</sup> Richard I. Walton,<sup>b</sup> Simone Mascotto<sup>c</sup> and Silvia Gross<sup>a</sup>

<sup>a</sup>Dipartimento di Scienze Chimiche- Università degli Studi di Padova – Via Marzolo 1, 35131 Padova ITALY

<sup>b</sup>Department of Chemistry, University of Warwick, Gibbet Hill Road, Coventry, CV4 7AL, UK

<sup>c</sup>Institut für Anorganische und Angewandte Chemie, University of Hamburg, Martin-Luther-King Platz 6, Raum AC 3, 20146 Hamburg, GERMANY

**Table S1: Examples of hydrothermal synthesis of BiFeO<sub>3</sub>**

| Precursors                                                                                                   | Mineraliser and Other Additives                    | Temperature/Time [other conditions] | Crystal Form                                | Notes                                                                                                                                        | Reference |
|--------------------------------------------------------------------------------------------------------------|----------------------------------------------------|-------------------------------------|---------------------------------------------|----------------------------------------------------------------------------------------------------------------------------------------------|-----------|
| Bi(NO <sub>3</sub> ) <sub>3</sub> ·5H <sub>2</sub> O<br>Fe(NO <sub>3</sub> ) <sub>3</sub> ·9H <sub>2</sub> O | 10 M KOH                                           | 194 °C / 2 hours<br>[microwave]     | agglomerated microcrystals                  |                                                                                                                                              | 1         |
| Bi(NO <sub>3</sub> ) <sub>3</sub> ·5H <sub>2</sub> O<br>Fe(NO <sub>3</sub> ) <sub>3</sub> ·9H <sub>2</sub> O | 4 M KOH                                            | 200 – 220 °C / 2.5 – 20 hours       | submicron                                   | Bi <sub>2</sub> Fe <sub>4</sub> O <sub>9</sub><br>Bi <sub>25</sub> FeO <sub>40</sub><br>competing at higher pH                               | 2         |
| Bi(NO <sub>3</sub> ) <sub>3</sub> ·5H <sub>2</sub> O<br>Fe(NO <sub>3</sub> ) <sub>3</sub> ·9H <sub>2</sub> O | 5 M NaOH<br>H <sub>2</sub> O <sub>2</sub>          | 200 °C                              | spindles<br>500 nm                          | Bi <sub>12</sub> Fe <sub>0.63</sub> O <sub>18.945</sub><br>Bi <sub>2</sub> Fe <sub>4</sub> O <sub>9</sub><br>depending on pH and metal ratio | 3         |
| Bi(NO <sub>3</sub> ) <sub>3</sub> ·5H <sub>2</sub> O<br>Fe(NO <sub>3</sub> ) <sub>3</sub> ·9H <sub>2</sub> O | ~11 M KOH<br>1.3 M Na <sub>2</sub> CO <sub>3</sub> | 180 °C/ 30 minutes<br>[microwave]   | nanocubes<br>50–200 nm                      |                                                                                                                                              | 4         |
| NaBiO <sub>3</sub> ·nH <sub>2</sub> O<br>Fe(NO <sub>3</sub> ) <sub>3</sub> ·9H <sub>2</sub> O                | KOH<br>[K]/[Bi] = 120–240                          | 180 °C/ 48 hours                    | 0.1 × 0.1 × 0.1 mm <sup>3</sup>             | Bi <sub>12.5</sub> Fe <sub>0.5</sub> O <sub>19.5</sub><br>and Bi <sub>2</sub> Fe <sub>4</sub> O <sub>9</sub><br>competing phases             | 5         |
|                                                                                                              |                                                    | 180 °C/ 7 days                      | 0.5 × 0.5 × 0.5 mm <sup>3</sup>             |                                                                                                                                              |           |
| Bi(NO <sub>3</sub> ) <sub>3</sub> ·5H <sub>2</sub> O<br>Fe(NO <sub>3</sub> ) <sub>3</sub> ·9H <sub>2</sub> O | 4 M KOH<br>triethanolamine                         | 130 °C / 24 hours                   | spherical ~ 100 nm diameter                 | triethanolamine lowers reaction temperature needed                                                                                           | 6         |
| Bi(NO <sub>3</sub> ) <sub>3</sub> ·5H <sub>2</sub> O<br>Fe(NO <sub>3</sub> ) <sub>3</sub> ·9H <sub>2</sub> O | 8 M KOH                                            | 160 °C / 28 hours                   | ‘walnut-like’ micro-spheres <i>ca</i> 30 μm | Bi <sub>25</sub> FeO <sub>40</sub><br>at longer reactions times                                                                              | 7         |
| Bi(NO <sub>3</sub> ) <sub>3</sub> ·5H <sub>2</sub> O                                                         | 12 M KOH                                           | 200 °C / 24 – 48 hours              | ‘nanoflakes’ 100–200 nm diameter            |                                                                                                                                              | 8         |

|                                                                                                              |                                                        |                                               |                                                                                                    |                                                                                        |    |
|--------------------------------------------------------------------------------------------------------------|--------------------------------------------------------|-----------------------------------------------|----------------------------------------------------------------------------------------------------|----------------------------------------------------------------------------------------|----|
| $\text{Fe}(\text{NO}_3)_3 \cdot 9\text{H}_2\text{O}$                                                         | $\text{KNO}_3$                                         |                                               |                                                                                                    |                                                                                        |    |
| $\text{Bi}(\text{NO}_3)_3 \cdot 5\text{H}_2\text{O}$<br>$\text{Fe}(\text{NO}_3)_3 \cdot 9\text{H}_2\text{O}$ | 8 M KOH                                                | 200 °C / 3 – 24 hours                         | Microspheres: agglomerates of primary particles                                                    | Electronic band gap and magnetism correlated to crystal morphology                     | 9  |
|                                                                                                              | 12 M KOH                                               |                                               | microcubes                                                                                         |                                                                                        |    |
|                                                                                                              | 12 M KOH<br>polyethylene glycol                        |                                               | submicrocubes                                                                                      |                                                                                        |    |
| $\text{Bi}(\text{NO}_3)_3 \cdot 5\text{H}_2\text{O}$<br>$\text{Fe}(\text{NO}_3)_3 \cdot 9\text{H}_2\text{O}$ | 8 M KOH                                                | 175 - 225 °C / 6 hours                        | agglomerates of irregular-shaped particles 10 -100 nm                                              |                                                                                        | 10 |
| $\text{Bi}(\text{NO}_3)_3 \cdot 5\text{H}_2\text{O}$<br>$\text{Fe}(\text{NO}_3)_3 \cdot 9\text{H}_2\text{O}$ | NaOH<br>$\text{HNO}_3$<br>polyvinylpyrrolidone/ethanol | 180 °C / 6 hours                              | agglomerated nanoparticles in 1 $\mu\text{m}$ diameter microrods                                   |                                                                                        | 11 |
| $\text{Bi}(\text{NO}_3)_3 \cdot 5\text{H}_2\text{O}$<br>$\text{Fe}(\text{NO}_3)_3 \cdot 9\text{H}_2\text{O}$ | 1 – 9 M KOH                                            | 200 °C / 12 hours                             | shape evolution from sphere to octahedron, truncated octahedron, cubo-octahedron or truncated cube |                                                                                        | 12 |
| $\text{Bi}(\text{NO}_3)_3$<br>$\text{Fe}(\text{NO}_3)_3 \cdot 9\text{H}_2\text{O}$                           | 4 M KOH                                                | 180 °C / 1 hour<br>[microwave]                | intergrown submicron crystals                                                                      |                                                                                        | 13 |
| $\text{Bi}(\text{NO}_3)_3 \cdot 5\text{H}_2\text{O}$<br>$\text{Fe}(\text{NO}_3)_3 \cdot 9\text{H}_2\text{O}$ | polyvinylalcohol/HCl<br>7 M KOH                        | 180 °C / 24 hours                             | 150 nm particles                                                                                   | $\text{Bi}_{25}\text{FeO}_{40}$ formed at shorter reaction times or lower temperatures | 14 |
|                                                                                                              |                                                        | 140 °C 6 hours                                |                                                                                                    |                                                                                        |    |
| $\text{BiCl}_3$<br>$\text{FeCl}_3 \cdot 6\text{H}_2\text{O}$                                                 | 1 – 5 M NaOH<br>$\text{NH}_4\text{Cl}$                 | 140 - 200 °C / 6 hours                        | agglomerates – irregular cubes                                                                     | addition of $\text{NH}_4\text{Cl}$ influences purity and crystallinity                 | 15 |
| $\text{Bi}(\text{NO}_3)_3 \cdot 5\text{H}_2\text{O}$<br>$\text{FeCl}_3 \cdot 6\text{H}_2\text{O}$            | 4 – 7 M KOH                                            | 200 °C / 4 hours                              | agglomerates – cubes > 10 $\mu\text{m}$ with increasing KOH concentration                          |                                                                                        | 16 |
| $\text{Bi}(\text{NO}_3)_3 \cdot 5\text{H}_2\text{O}$<br>$\text{Fe}(\text{NO}_3)_3 \cdot 9\text{H}_2\text{O}$ | 2N $\text{HNO}_3$<br>8 M KOH                           | 200 °C / 6 hours<br>[4 - 12 T magnetic field] | irregular cubes, linked to give chains                                                             | magnetic field influences crystallite morphology                                       | 17 |
| $\text{Bi}(\text{NO}_3)_3 \cdot 5\text{H}_2\text{O}$<br>$\text{Fe}(\text{NO}_3)_3 \cdot 9\text{H}_2\text{O}$ | 4 – 12 M KOH<br>$\text{Na}_2\text{CO}_3$               | 160 – 200 °C / 30-60 mins<br>[2.45 GHz        | agglomerates of submicron cuboids                                                                  | $\text{Na}_2\text{CO}_3$ lowered temperature required and adjusted crystal morphology  | 18 |

|                                                                                                              |                                                        |                                  |                                                                                   |                                                                                                                                                |    |
|--------------------------------------------------------------------------------------------------------------|--------------------------------------------------------|----------------------------------|-----------------------------------------------------------------------------------|------------------------------------------------------------------------------------------------------------------------------------------------|----|
|                                                                                                              |                                                        | microwave]                       |                                                                                   |                                                                                                                                                |    |
| BiCl <sub>3</sub><br>FeCl <sub>3</sub>                                                                       | 5.7 - 20 M KOH<br>surfactant (PEG, EDTA, CTAB,<br>PVP) | 180 °C /6 hours                  | irregular micron-sized agglomerates,<br>becoming cuboid at higher pH              | effect of surfactant is not significant                                                                                                        | 19 |
| Bi(NO <sub>3</sub> ) <sub>3</sub> ·5H <sub>2</sub> O<br>Fe(NO <sub>3</sub> ) <sub>3</sub> ·9H <sub>2</sub> O | 6 – 10 M NaOH                                          | 180 °C /up to 24 hours           | > 10 μm cuboids                                                                   | Bi <sub>2</sub> Fe <sub>4</sub> O <sub>9</sub> and Bi <sub>25</sub> FeO <sub>40</sub> observed in<br>competition                               | 20 |
| Bi(NO <sub>3</sub> ) <sub>3</sub> ·5H <sub>2</sub> O<br>Fe(NO <sub>3</sub> ) <sub>3</sub> ·9H <sub>2</sub> O | 7 M KOH<br>acetone                                     | 130 °C / 12 hours                | cubic particles with the size range<br>from 50 to 200 nm                          | acetone lowers temperature of<br>synthesis and avoids formation of<br>Bi <sub>12</sub> (Bi <sub>0.5</sub> Fe <sub>0.5</sub> )O <sub>19.5</sub> | 21 |
| Bi(NO <sub>3</sub> ) <sub>3</sub> ·5H <sub>2</sub> O<br>Fe(NO <sub>3</sub> ) <sub>3</sub> ·9H <sub>2</sub> O | 3 M KOH<br>ethylene glycol                             | 120 –140 °C /12 hours            | agglomerates to give spherical<br>microstructure with diameter ~ 10<br>μm         |                                                                                                                                                | 22 |
| Bi(NO <sub>3</sub> ) <sub>3</sub> ·5H <sub>2</sub> O<br>Fe(NO <sub>3</sub> ) <sub>3</sub> ·9H <sub>2</sub> O | 8 M KOH<br>2-methoxy ethanol                           | 200 °C /10 hours                 | agglomerated nanorods length<br>between 15 and 20 nm and diameter<br>of ~ 2–3 nm. |                                                                                                                                                | 23 |
| Bi(NO <sub>3</sub> ) <sub>3</sub> ·5H <sub>2</sub> O<br>FeCl <sub>3</sub> ·6H <sub>2</sub> O                 | NH <sub>4</sub> OH pH = 12-13<br>acetone               | 200 °C /48 hours                 | nanorods: 100 nm × 1 μm length                                                    |                                                                                                                                                | 24 |
| Bi(NO <sub>3</sub> ) <sub>3</sub> ·5H <sub>2</sub> O<br>Fe(NO <sub>3</sub> ) <sub>3</sub> ·9H <sub>2</sub> O | 9 M KOH<br>hexadecyl trimethyl<br>ammoniumbromide      | 180 °C for 90 min<br>[microwave] | agglomerated faceted crystals in 10<br>μm microspheres                            |                                                                                                                                                | 25 |

## References

1. S. Komarneni, V. C. Menon, Q. H. Li, R. Roy and E. Ainger, *J. Am. Ceram. Soc.*, 1996, **79**, 1409-1412.
2. C. Chen, J. R. Cheng, S. W. Yu, L. J. Che and Z. Y. Meng, *J. Cryst. Growth*, 2006, **291**, 135-139.
3. J. T. Han, Y. H. Huang, X. J. Wu, C. L. Wu, W. Wei, B. Peng, W. Huang and J. B. Goodenough, *Adv. Mater.*, 2006, **18**, 2145-+.
4. U. A. Joshi, J. S. Jang, P. H. Borse and J. S. Lee, *Appl. Phys. Lett.*, 2008, **92**, 3.
5. H. Jiang, Y. Morozumi, N. Kumada, Y. Yonesaki, T. Takei and N. Kinomura, *J. Ceram. Soc. Jpn.*, 2008, **116**, 837-839.
6. C. M. Cho, J. H. Noh, I. S. Cho, J. S. An, K. S. Hong and J. Y. Kim, *J. Am. Ceram. Soc.*, 2008, **91**, 3753-3755.
7. Y. J. Chen, Q. S. Wu and J. Zhao, *J. Alloy. Compd.*, 2009, **487**, 599-604.
8. Y. G. Wang, G. Xu, L. L. Yang, Z. H. Ren, X. Wei, W. J. Weng, P. Y. Du, G. Shen and G. R. Han, *Ceram. Int.*, 2009, **35**, 1285-1287.
9. S. Li, Y. H. Lin, B. P. Zhang, Y. Wang and C. W. Nan, *J. Phys. Chem. C*, 2010, **114**, 2903-2908.
10. S. H. Han, K. S. Kim, H. G. Kim, H. G. Lee, H. W. Kang, J. S. Kim and C. Il Cheon, *Ceram. Int.*, 2010, **36**, 1365-1372.
11. L. Zhang, X. F. Cao, Y. L. Ma, X. T. Chen and Z. L. Xue, *J. Solid State Chem.*, 2010, **183**, 1761-1766.
12. X. Z. Chen, Z. C. Qiu, J. P. Zhou, G. Q. Zhu, X. B. Bian and P. Liu, *Mater. Chem. Phys.*, 2011, **126**, 560-567.
13. G. Biasotto, A. Z. Simoes, C. R. Foschini, M. A. Zaghete, J. A. Varela and E. Longo, *Mater. Res. Bull.*, 2011, **46**, 2543-2547.
14. D. R. Cai, J. M. Li, T. Tong, D. R. Jin, S. W. Yu and J. R. Cheng, *Mater. Chem. Phys.*, 2012, **134**, 139-144.
15. Z. C. Qiu, J. P. Zhou, G. Q. Zhu, X. M. Chen, R. L. Yang, Y. H. Song and P. Liu, *J. Nanosci. Nanotechnol.*, 2012, **12**, 6552-6557.
16. J. P. Zhou, R. L. Yang, R. J. Xiao, X. M. Chen and C. Y. Deng, *Mater. Res. Bull.*, 2012, **47**, 3630-3636.
17. L. Hou, K. H. Zuo, Q. B. Sun, Z. M. Ren, Y. P. Zeng and X. Li, *Appl. Phys. Lett.*, 2013, **102**, 4.
18. C. Ponzoni, R. Rosa, M. Cannio, V. Buscaglia, E. Finocchio, P. Nanni and C. Leonelli, *J. Alloy. Compd.*, 2013, **558**, 150-159.
19. C. Y. Song, J. B. Xu, A. Yimamu and L. Wang, *Integr. Ferroelectr.*, 2014, **153**, 33-41.
20. D. Z. Yan, C. L. Sun, J. K. Jian, Y. F. Sun, R. Wu and J. Li, *J. Mater. Sci.-Mater. Electron.*, 2014, **25**, 928-935.
21. Z. W. Chen and W. L. Jin, *J. Mater. Sci.-Mater. Electron.*, 2014, **25**, 4039-4045.
22. Z. W. Chen, W. L. Jin, Z. Y. Lu and C. C. Hu, *J. Mater. Sci.-Mater. Electron.*, 2015, **26**, 1077-1086.
23. R. Dhanalakshmi, M. Muneeswaran, P. R. Vanga, M. Ashok and N. V. Giridharan, *Appl. Phys. A-Mater. Sci. Process.*, 2016, **122**, 14.
24. C. L. Fu, F. Sun, J. X. Hao, R. L. Gao, W. Cai, G. Chen and X. L. Deng, *J. Mater. Sci.-Mater. Electron.*, 2016, **27**, 8242-8246.
25. X. Y. Sun, Z. W. Liu, H. Y. Yu, Z. G. Zheng and D. C. Zeng, *Mater. Lett.*, 2018, **219**, 225-228.
